# Supplementary material for: Effects of Long Chain Fatty Acid Synthesis and Associated Gene Expression in Microalga Tetraselmis sp
Source: PubMed Central journal article supplement (PMC4071582; doi:10.3390/md12063381), 2014-06-04
Supplement: marinedrugs-12-03381-s001.pdf [file marinedrugs-12-03381-s001.pdf]

## Supplementary Information

**Table S1.** Expression profiles for 15 genes in *Tetraselmis* sp. Transcript abundances are shown relative to *ACTIN* measured by qRT-PCR from three independent biological replicates. Data represent mean values  $\pm$ SDs.

| Genes       | Salinity          |                   |                   |                   |                    |                   |                   |                    |                    |
|-------------|-------------------|-------------------|-------------------|-------------------|--------------------|-------------------|-------------------|--------------------|--------------------|
|             | 5                 |                   |                   | 10                |                    |                   | 30                |                    |                    |
|             | 2                 | 4                 | 6                 | 2                 | 4                  | 6                 | 2                 | 4                  | 6                  |
| BKAS        | 0.149 $\pm$ 0.028 | 1.649 $\pm$ 0.404 | 0.149 $\pm$ 0.101 | 0.166 $\pm$ 0.078 | 1.639 $\pm$ 0.130  | 0.204 $\pm$ 0.086 | 0.379 $\pm$ 0.325 | 1.947 $\pm$ 0.328  | 0.768 $\pm$ 0.480  |
| $\Delta$ 5D | 0.175 $\pm$ 0.045 | 0.212 $\pm$ 0.043 | 0.363 $\pm$ 0.098 | 0.142 $\pm$ 0.081 | 0.215 $\pm$ 0.021  | 0.252 $\pm$ 0.125 | 0.141 $\pm$ 0.009 | 0.281 $\pm$ 0.045  | 0.351 $\pm$ 0.068  |
| $\Delta$ 6E | 0.051 $\pm$ 0.007 | 0.686 $\pm$ 0.115 | 0.174 $\pm$ 0.073 | 0.017 $\pm$ 0.010 | 0.300 $\pm$ 0.061  | 0.107 $\pm$ 0.024 | 0.054 $\pm$ 0.066 | 0.323 $\pm$ 0.030  | 0.035 $\pm$ 0.029  |
| ACSase      | 0.270 $\pm$ 0.355 | 5.113 $\pm$ 1.665 | 2.226 $\pm$ 0.316 | 1.014 $\pm$ 0.311 | 2.676 $\pm$ 1.257  | 0.457 $\pm$ 0.148 | 0.583 $\pm$ 0.082 | 1.502 $\pm$ 0.515  | 0.695 $\pm$ 0.303  |
| $\Delta$ 5E | 0.029 $\pm$ 0.011 | 0.644 $\pm$ 0.767 | 0.074 $\pm$ 0.086 | 0.015 $\pm$ 0.009 | 0.119 $\pm$ 0.018  | 0.029 $\pm$ 0.002 | 0.105 $\pm$ 0.156 | 0.135 $\pm$ 0.033  | 0.217 $\pm$ 0.062  |
| D3PDH       | 0.040 $\pm$ 0.007 | 0.184 $\pm$ 0.102 | 0.065 $\pm$ 0.016 | 0.035 $\pm$ 0.014 | 0.079 $\pm$ 0.026  | 0.064 $\pm$ 0.045 | 0.278 $\pm$ 0.403 | 0.096 $\pm$ 0.024  | 0.160 $\pm$ 0.163  |
| G6Pi        | 0.368 $\pm$ 0.039 | 0.364 $\pm$ 0.084 | 0.392 $\pm$ 0.184 | 0.252 $\pm$ 0.110 | 0.296 $\pm$ 0.040  | 0.141 $\pm$ 0.057 | 0.533 $\pm$ 0.398 | 0.599 $\pm$ 0.262  | 0.648 $\pm$ 0.373  |
| PyKPA       | 1.920 $\pm$ 0.796 | 9.048 $\pm$ 0.878 | 7.455 $\pm$ 3.141 | 1.691 $\pm$ 0.803 | 14.376 $\pm$ 2.968 | 3.208 $\pm$ 2.273 | 6.920 $\pm$ 7.919 | 27.129 $\pm$ 8.719 | 16.692 $\pm$ 7.390 |
| PHO         | 0.128 $\pm$ 0.031 | 0.212 $\pm$ 0.093 | 0.310 $\pm$ 0.162 | 0.071 $\pm$ 0.059 | 0.253 $\pm$ 0.099  | 0.388 $\pm$ 0.146 | 0.516 $\pm$ 0.818 | 0.458 $\pm$ 0.127  | 0.812 $\pm$ 0.627  |
| KAR         | 0.117 $\pm$ 0.070 | 0.272 $\pm$ 0.057 | 0.077 $\pm$ 0.057 | 0.062 $\pm$ 0.037 | 0.057 $\pm$ 0.018  | 0.063 $\pm$ 0.068 | 0.109 $\pm$ 0.118 | 0.077 $\pm$ 0.046  | 0.198 $\pm$ 0.219  |
| $\Delta$ 8D | 0.336 $\pm$ 0.097 | 0.728 $\pm$ 0.072 | 0.861 $\pm$ 0.327 | 0.304 $\pm$ 0.102 | 1.373 $\pm$ 0.228  | 0.835 $\pm$ 0.402 | 0.350 $\pm$ 0.058 | 2.266 $\pm$ 0.582  | 1.672 $\pm$ 1.165  |
| ENR         | 0.494 $\pm$ 0.287 | 0.647 $\pm$ 0.080 | 0.130 $\pm$ 0.058 | 0.207 $\pm$ 0.061 | 0.431 $\pm$ 0.103  | 0.089 $\pm$ 0.022 | 0.157 $\pm$ 0.135 | 0.328 $\pm$ 0.055  | 0.649 $\pm$ 0.293  |
| PP          | 0.136 $\pm$ 0.023 | 0.162 $\pm$ 0.068 | 0.091 $\pm$ 0.041 | 0.108 $\pm$ 0.087 | 0.150 $\pm$ 0.018  | 0.113 $\pm$ 0.026 | 0.596 $\pm$ 0.878 | 0.161 $\pm$ 0.073  | 0.239 $\pm$ 0.169  |
| $\Delta$ 9D | 0.795 $\pm$ 0.071 | 0.950 $\pm$ 0.113 | 0.701 $\pm$ 0.335 | 0.601 $\pm$ 0.304 | 0.504 $\pm$ 0.046  | 0.272 $\pm$ 0.129 | 1.129 $\pm$ 1.509 | 0.564 $\pm$ 0.078  | 0.516 $\pm$ 0.470  |
| DGAT        | 0.093 $\pm$ 0.009 | 0.468 $\pm$ 0.041 | 0.240 $\pm$ 0.077 | 0.093 $\pm$ 0.015 | 0.247 $\pm$ 0.075  | 0.131 $\pm$ 0.040 | 1.142 $\pm$ 1.865 | 0.134 $\pm$ 0.017  | 0.171 $\pm$ 0.060  |

Table S1. Cont.

| Genes  | Salinity     |               |                |              |               |                |
|--------|--------------|---------------|----------------|--------------|---------------|----------------|
|        | 40           |               |                | 50           |               |                |
|        | 2            | 4             | 6              | 2            | 4             | 6              |
| BKAS   | 0.223 ±0.005 | 0.0487 ±0.073 | 0.471 ±0.126   | 0.774 ±0.130 | 0.467 ±0.096  | 1.052 ±1.209   |
| Δ5D    | 0.154 ±0.019 | 0.536 ±0.049  | 0.623 ±0.096   | 0.164 ±0.013 | 0.503 ±0.069  | 0.048 ±0.072   |
| Δ6E    | 0.015 ±0.004 | 0.210 ±0.042  | 2.046 ±0.491   | 0.100 ±0.014 | 0.255 ±0.043  | 16.182 ±24.053 |
| ACSase | 0.616 ±0.087 | 1.073 ±0.095  | 0.137 ±0.145   | 1.387 ±0.458 | 1.765 ±0.168  | 0.277 ±0.086   |
| Δ5E    | 0.039 ±0.012 | 0.046 ±0.018  | 0.113 ±0.026   | 0.036 ±0.011 | 0.020 ±0.007  | 0.171 ±0.076   |
| D3PDH  | 0.066 ±0.002 | 0.065 ±0.007  | 0.054 ±0.025   | 0.103 ±0.016 | 0.070 ±0.020  | 0.303 ±0.378   |
| G6Pi   | 0.428 ±0.028 | 0.528 ±0.062  | 0.638 ±0.256   | 0.546 ±0.053 | 0.644 ±0.064  | 0.666 ±0.514   |
| PyKPA  | 1.924 ±0.229 | 19.629 ±3.267 | 28.159 ±15.907 | 6.85 ±2.404  | 25.619 ±8.388 | 16.751 ±11.871 |
| PHO    | 0.036 ±0.008 | 0.311 ±0.086  | 0.884 ±0.419   | 0.017 ±0.007 | 0.386 ±0.085  | 0.703 ±0.478   |
| KAR    | 0.059 ±0.020 | 0.088 ±0.020  | 0.082 ±0.010   | 0.177 ±0.018 | 0.059 ±0.013  | 2.503 ±4.230   |
| Δ8D    | 0.400 ±0.079 | 1.946 ±0.203  | 1.555 ±0.490   | 0.478 ±0.031 | 1.478 ±0.401  | 0.733 ±0.590   |
| ENR    | 0.147 ±0.035 | 0.081 ±0.008  | 0.567 ±0.216   | 0.207 ±0.073 | 0.095 ±0.001  | 0.803 ±0.677   |
| PP     | 0.088 ±0.003 | 0.116 ±0.019  | 0.172 ±0.057   | 0.049 ±0.011 | 0.127 ±0.042  | 0.312 ±0.294   |
| Δ9D    | 0.897 ±0.093 | 0.671 ±0.015  | 0.325 ±0.303   | 0.889 ±0.142 | 0.688 ±0.115  | 0.720 ±0.119   |
| DGAT   | 0.091 ±0.008 | 0.309 ±0.048  | 0.147 ±0.055   | 0.095 ±0.023 | 0.344 ±0.191  | 0.209 ±0.036   |

**Table S2.** Total FA shown in ng/mg DW and %FA/mg DW in *Tetraselmis* sp. cultivated at different salinities (5 ppt, 10 ppt, 30 ppt, 40 ppt and 50 ppt), under nutrient stress (Day 2, nutrient replete; Day 4, nutrient deplete; Day 6, nutrient starved. Data represent mean values  $\pm$ SDs from three independently-grown cultures.

| Salinity | Day | Total FA ng/mL     | %FA/mg DW        |
|----------|-----|--------------------|------------------|
| 5 ppt    | 2   | 147.57 $\pm$ 3.26  | 22.14 $\pm$ 0.49 |
|          | 4   | 63.09 $\pm$ 11.12  | 11.36 $\pm$ 2.00 |
|          | 6   | 144.28 $\pm$ 22.72 | 17.31 $\pm$ 2.73 |
| 10 ppt   | 2   | 130.45 $\pm$ 1.21  | 19.57 $\pm$ 0.18 |
|          | 4   | 83.53 $\pm$ 4.30   | 12.53 $\pm$ 0.64 |
|          | 6   | 159.05 $\pm$ 9.37  | 19.09 $\pm$ 1.12 |
| 30 ppt   | 2   | 96.66 $\pm$ 14.58  | 14.5 $\pm$ 2.19  |
|          | 4   | 122.44 $\pm$ 14.44 | 14.69 $\pm$ 1.73 |
|          | 6   | 179.02 $\pm$ 36.55 | 16.11 $\pm$ 3.29 |
| 40 ppt   | 2   | 97.16 $\pm$ 9.32   | 14.57 $\pm$ 1.40 |
|          | 4   | 144.39 $\pm$ 48.85 | 17.33 $\pm$ 5.86 |
|          | 6   | 114.1 $\pm$ 98.91  | 15.4 $\pm$ 0.56  |
| 50 ppt   | 2   | 113.72 $\pm$ 24.65 | 17.06 $\pm$ 3.70 |
|          | 4   | 88.55 $\pm$ 16.78  | 13.28 $\pm$ 2.52 |
|          | 6   | 175.31 $\pm$ 47.33 | 21.04 $\pm$ 5.68 |
